# Supplementary material for: Antitumor effects of Mzs-1 from Chinese Artium lappa L. on HGC-27 cells via the PI3K/AKT/mTOR pathway in vitro and in vivo.
Source: Research Square preprint supplement (doi:10.21203/rs.3.rs-6972121/v1), 2025-08-20

Original blot image for **β-actin** (cellular experiment, Fig. 2G)


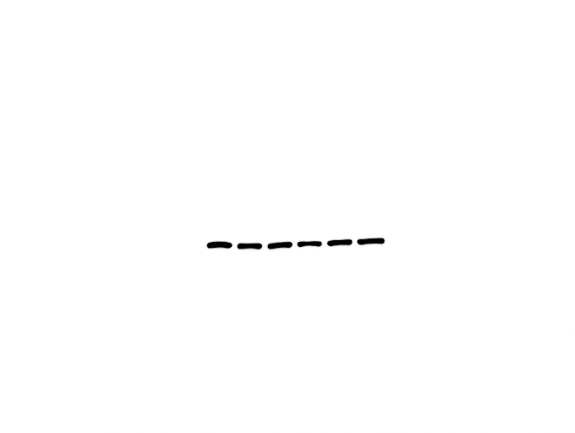

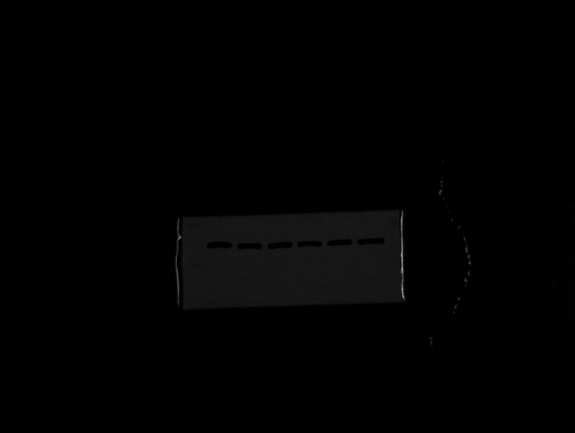


Original blot image for **BAX** (cellular experiment, Fig. 2G)


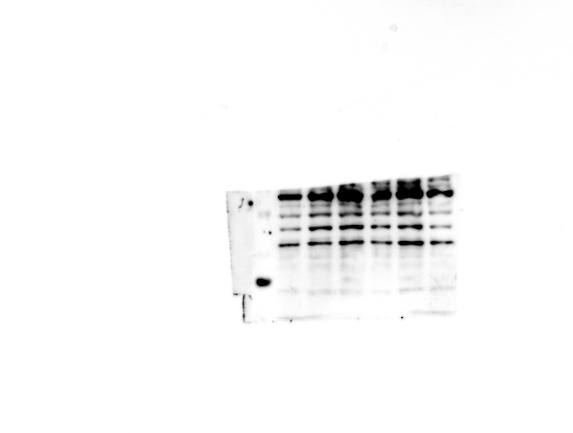

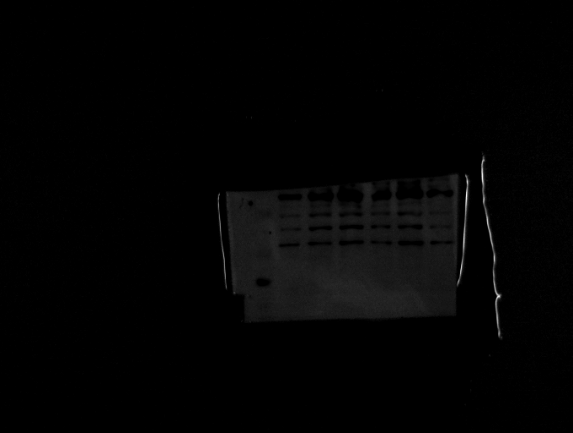


Original blot image for **BCL-2**(cellular experiment, Fig. 2G)


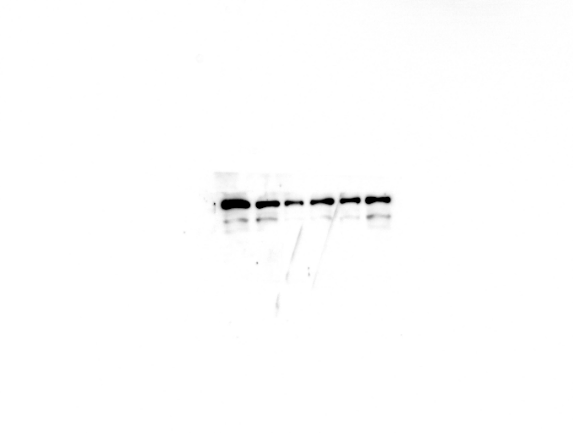

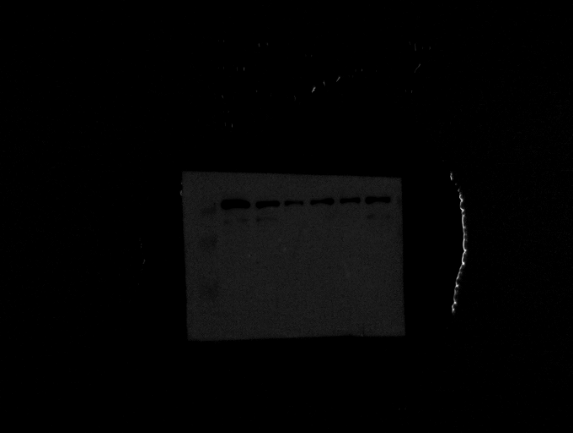


Original blot image for **caspase-3**(cellular experiment, Fig. 2G)


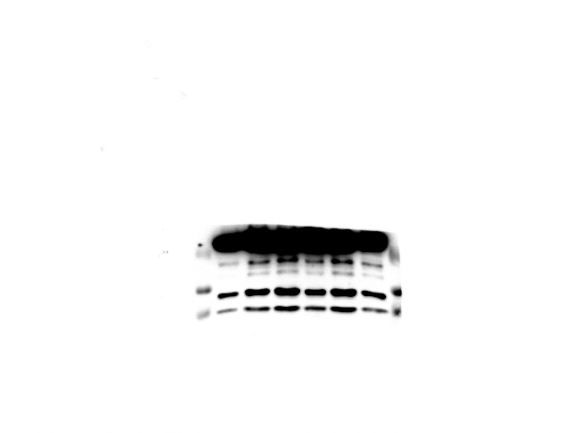

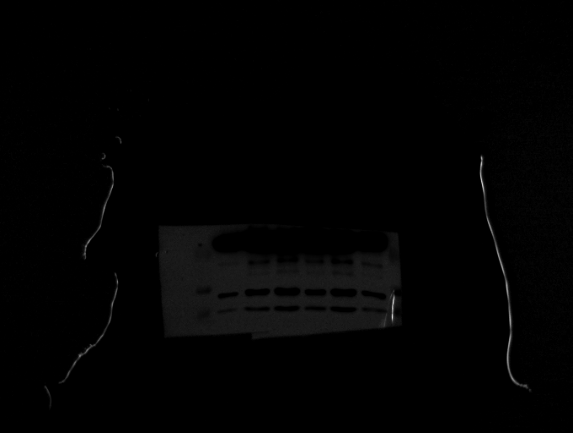


Original blot image for **PI3K**(cellular experiment, Fig. 2G)


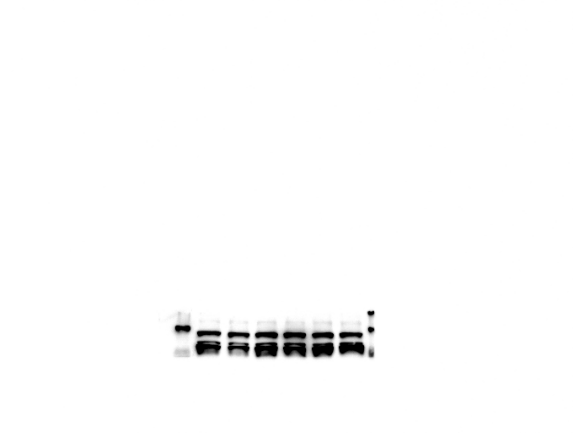

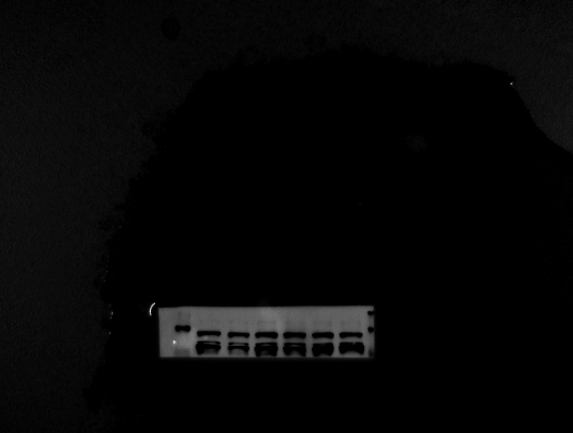


Original blot image for **P-PI3K**(cellular experiment, Fig. 2G)


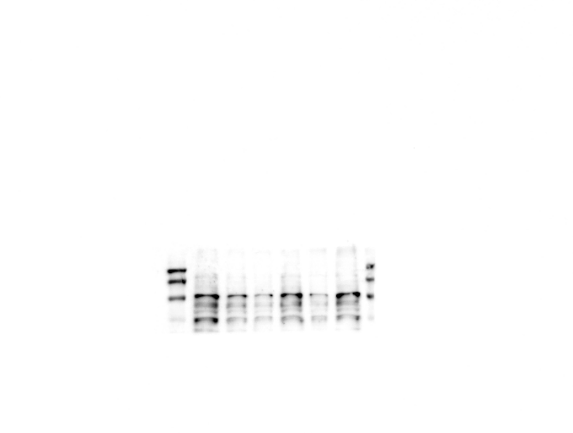

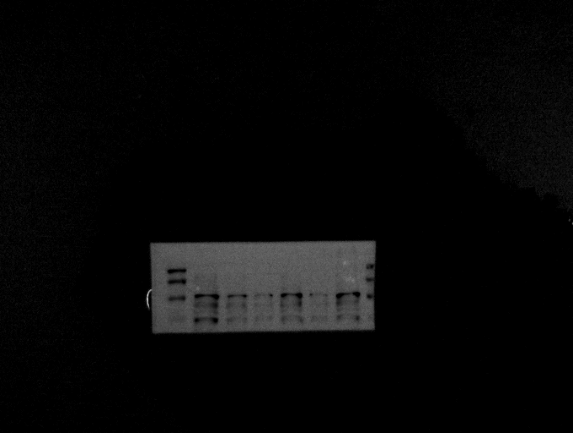


Original blot image for **mTOR**(cellular experiment, Fig. 2G)


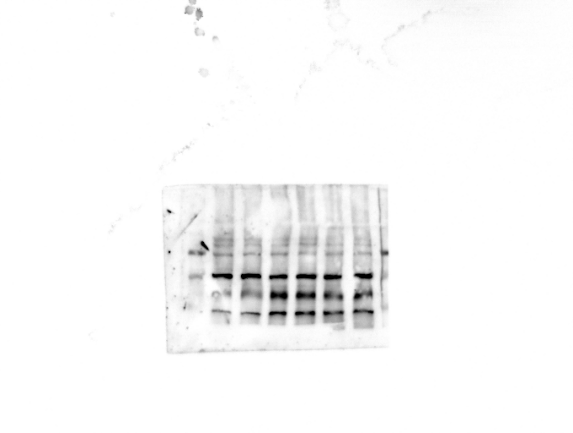

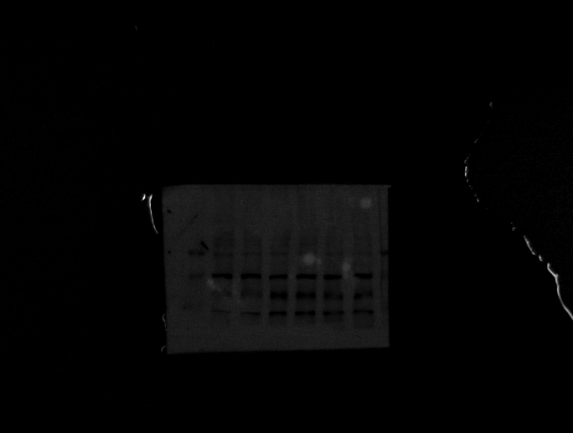


Original blot image for **P-mTOR**(cellular experiment, Fig. 2G)


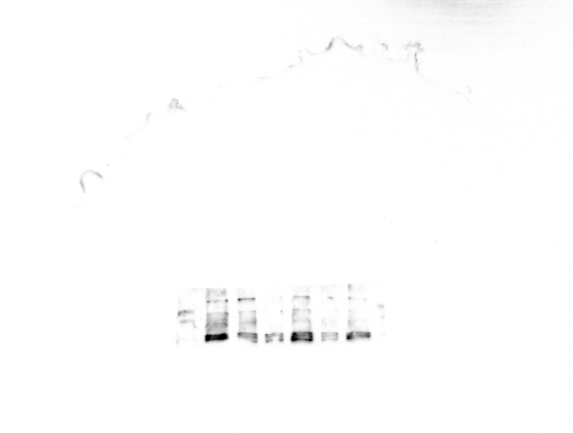

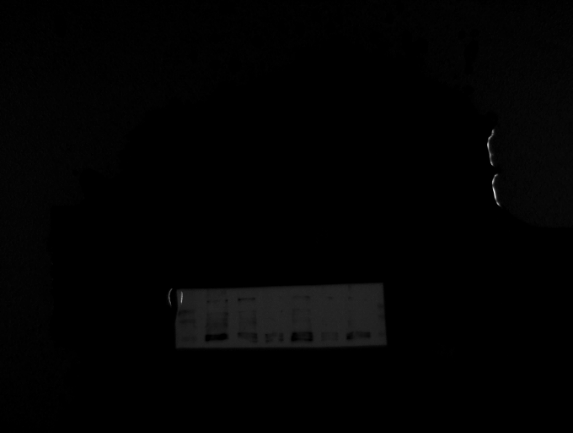


Original blot image for **p-PI3K** (xenograft tumor tissue, Fig. 3D)

**0W**


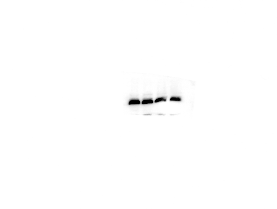

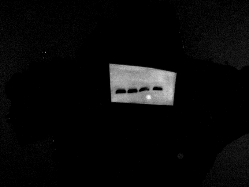


**1W**


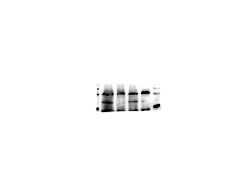

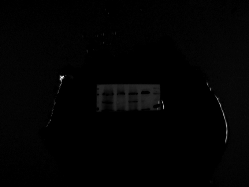


**2W**


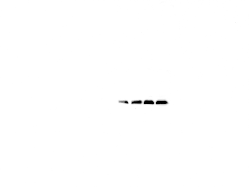

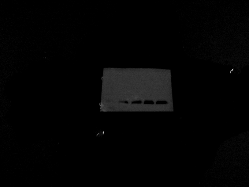


**3W**


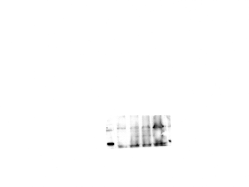

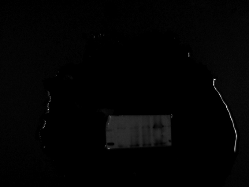


**4W**


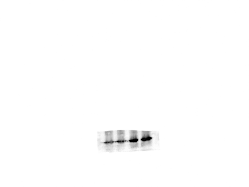

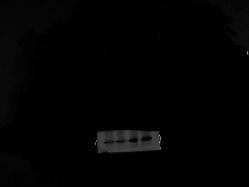


Original blot image for **PI3K** (xenograft tumor tissue, Fig. 3D)

**0W**


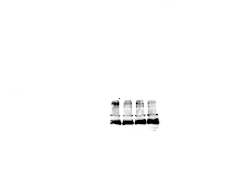

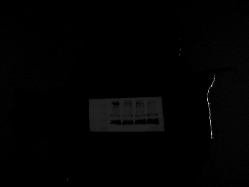


**1W**


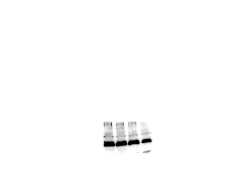

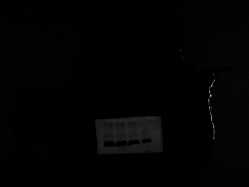


**2W**


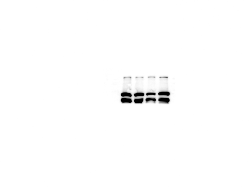

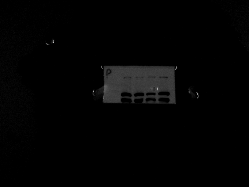


**3W**


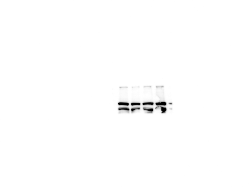

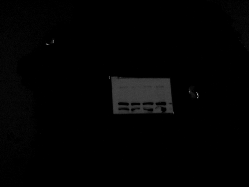


**4W**


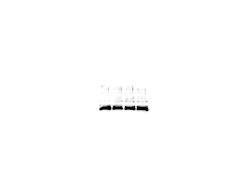

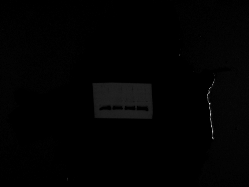


Original blot image for **caspase-3** (xenograft tumor tissue, Fig. 3D)

**0W**


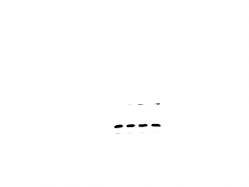

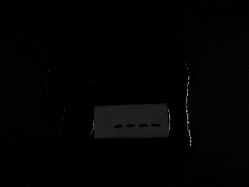


**1W**


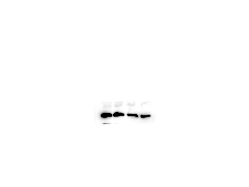

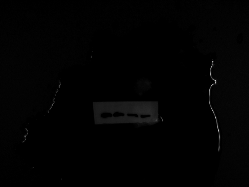


**2W**


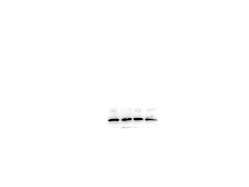

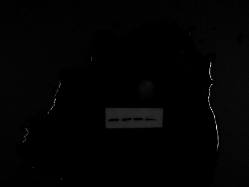


**3W**


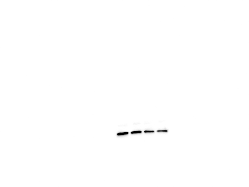

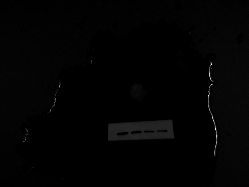


**4W**


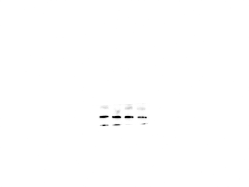

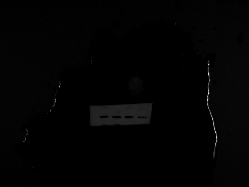

Supplement: Supplementary file 1 [file 0a762cdb3ededf18b0029988.docx]
