# Supplementary material for: Antitumor effects of Mzs-1 from Chinese Artium lappa L. on HGC-27 cells via the PI3K/AKT/mTOR pathway in vitro and in vivo.
Source: Research Square preprint supplement (doi:10.21203/rs.3.rs-6972121/v1), 2025-08-20
Supplement: Supplementary file 2 [file ff79e3945f07da4c41df6294.docx]

**Highlights**

1) Mzs-1, a synthetic analogue of *Arctium lappa L.* constituents, exhibits potent anti-tumor effects against gastric cancer in vitro and in vivo.

2) Mzs-1 suppresses proliferation, invasion, and induces apoptosis of HGC-27 cells by modulating the PI3K/AKT/mTOR pathway.

3) Pharmacological inhibition of PI3K enhances, while AKT activation attenuates, the anti-tumor efficacy of Mzs-1.

4) In xenograft models, Mzs-1 significantly reduces tumor burden and downregulates PI3K/AKT/mTOR signaling, highlighting its therapeutic potential.
